# 1 Host behaviour driven by awareness of infection risk amplifies the 2 chance of superspreading events

3 Kris V Parag<sup>1,2,\*</sup> and Robin N Thompson<sup>3</sup>

4 <sup>1</sup>MRC Centre for Global Infectious Disease Analysis, Imperial College London, London, UK.

5 <sup>2</sup>NIHR HPRU in Behavioural Science and Evaluation, University of Bristol, Bristol, UK.

6 <sup>3</sup>Mathematical Institute, University of Oxford, Oxford, UK.

7 \*For correspondence: [k.parag@imperial.ac.uk](mailto:k.parag@imperial.ac.uk).

## 8 Abstract

9 We demonstrate that heterogeneity in the perceived risks associated with infection within host  
10 populations amplifies the chances of superspreading during the crucial early stages of an  
11 epidemic. Under this behavioural model, individuals less concerned about the dangers from  
12 infection are more likely to be infected and attend larger-sized (riskier) events. For directly  
13 transmitted diseases such as COVID-19, this leads to infections being introduced at rates  
14 above the population prevalence to the events most conducive to superspreading. We develop  
15 an interpretable computational framework for evaluating within-event risks and derive a small-  
16 scale reproduction number measuring how the infections generated at an event depend on  
17 transmission heterogeneities and the number of introductions. This quantifies how event-scale  
18 patterns relate to population-level characteristics and generalises previous frameworks. As  
19 event duration and size grow, our reproduction number converges to the basic reproduction  
20 number. We illustrate that even moderate levels of heterogeneity in the perceived risks from  
21 infection substantially increase the likelihood of disproportionately large clusters of infections  
22 occurring at larger events, despite fixed overall disease prevalence. We show why collecting  
23 data linking host behaviour and event attendance is essential for accurately assessing the risk  
24 posed by an invading pathogen in the emerging stages of an outbreak.

25 **Keywords:** infectious diseases; behavioural models; risk awareness; reproduction numbers;  
26 importations; superspreading events.

## 27 Introduction

28 The prediction and prevention of superspreading events, which are characterised by primary  
29 infected individuals generating disproportionately large numbers of secondary infections [1],  
30 is a central challenge in infectious disease epidemiology. For acute, directly communicable  
31 diseases such as COVID-19, SARS and Ebola virus disease, superspreading is a major driver  
32 of transmission that leads to less frequent but more explosive outbreaks than we might expect

NOTE: This preprint reports new research that has not been certified by peer review and should not be used to guide clinical practice.

33 under more classical models that neglect the substantial variability in secondary infections  
34 generated by infected hosts [2]. During early or emergent stages of a potential epidemic, when  
35 there are limited immunity levels in the host population and transmission dynamics are  
36 inherently stochastic, superspreading events have been found responsible for spurring both  
37 the initial growth and eventual persistence of epidemics and for limiting the effectiveness of  
38 non-pharmaceutical interventions [1,3–5].

39 Consequently, identifying the main factors that underly the risk of superspreading is crucial for  
40 effective disease management [4]. Many of these factors are known, with heterogeneities in  
41 (i) host characteristics (e.g., susceptibility, infectiousness and contact patterns), (ii) pathogen  
42 biology (e.g., transmission routes and viral loads), (iii) environmental effects (e.g., ventilation  
43 and gathering size) and (iv) host behaviours (e.g., social customs and intervention adherence)  
44 all contributing to the risk of superspreading [3,4,6–8]. However, incorporating these factors  
45 in parsimonious modelling frameworks can be difficult because the mechanisms linking them  
46 to superspreading are still not fully understood. This is particularly the case for factors (iii) and  
47 (iv), with recurrent calls for more comprehensive data collection to help study the relationships  
48 among behavioural, environmental and epidemiological trends [9–11]. Here we explore how  
49 a key feature of host behaviour can shape the likelihood of superspreading and provide a  
50 mathematical demonstration of the benefits of collecting and analysing more data to elucidate  
51 the links between human behaviour and infectious disease epidemics.

52 We consider how heterogeneity in perceptions of the risk associated with infection throughout  
53 a host population impact heterogeneity in the transmission of new infections in the early stages  
54 of an epidemic. Risk awareness is a documented phenomenon in which individuals engage in  
55 self-protective behaviours in response to the perceived health, economic and other dangers  
56 of acquiring infection. The exact relationship between risk-perception and self-protection in a  
57 population exists on a spectrum spanning more risk-averse individuals to those with larger risk  
58 appetites (e.g., risk deniers) [12–14]. During an epidemic of a directly transmitted pathogen,  
59 risk-averse individuals may reduce their number of contacts by limiting their socialising and  
60 mobility, while those with larger risk appetites may increase their relative infection exposure  
61 (e.g., by hosting unregulated gatherings when infections are rising) [15]. Risk awareness can  
62 improve intervention efficacy (e.g., reducing mobility) or negate it (e.g., via deliberate non-  
63 compliance) and substantially change outbreak amplitudes and durations [11,16–19].

64 Despite its importance, the interplay between risk awareness and superspreading risk has not  
65 been studied in detail, with most research focussing on pathogen and host characteristics  
66 instead of exploring behavioural patterns. We study this interplay under a simple but plausible  
67 hypothesis – that more risk-averse hosts are more likely to avoid events of larger size, due to

68 the perception of heightened infection risk at those events [14,19]. Here, events are short-  
69 term gatherings (e.g., parties) so that only one generation of infection is possible. While data  
70 directly linking risk perception to event attendance are unavailable, it is known that individuals  
71 modify their behaviour in response to population-level prevalence and that the variability in  
72 individuals' level of acceptable risk relative to this prevalence baseline correlates well with the  
73 extent to which contacts are reduced during epidemics [12–14,20,21]. A likely pathway for  
74 reducing exposure to invading pathogens is by limiting attendance at riskier (voluntary) events.  
75 This logic underlies our hypothesis and subsequent analysis.

76 This awareness mechanism implies, for a fixed population prevalence, that larger events (e.g.,  
77 concerts, sports matches) are more likely to be attended by individuals who are less risk  
78 averse. Since there is limited infection-induced immunity in the host population during early  
79 epidemic stages, these individuals are also more likely to be infected. This stems from  
80 observations that those with larger numbers of contacts have elevated chances of acquiring  
81 infection, and these individuals are also likely to have larger risk appetites (more risk-averse  
82 individuals tend to reduce contacts) [22]. We posit that this coupling between behaviour and  
83 environment (i.e., modification of event attendance due to risk perception and event size) may  
84 amplify the chances of superspreading occurring at larger events, which have the capacity to  
85 support excessive numbers of infections. To test this hypothesis, we develop a framework to  
86 model the number of infections  $y$  generated at an event of size  $n$ , given that  $x$  initially infected  
87 individuals attend that event. This yields a small-scale reproduction number that extends  
88 recent approaches [23–25] to understanding within-event transmission in three directions.

89 First, we explicitly model the transmission-reducing effects of finite numbers of susceptible  
90 individuals ( $n - x$ ) and imported infections ( $x$ ) and at the event. As event size and duration  
91 grow, these finite size effects become less important and our small-scale reproduction number  
92 converges to  $R_0$ , the popular basic reproduction number. Second, we embed heterogeneity  
93 in transmission at the event within our small-scale reproduction number by allowing variations  
94 in secondary infections that are controlled by a dispersion parameter,  $k$ . This is a within-event  
95 version of the seminal model of superspreading [1,5,26] and includes the broad influence of  
96 factors (i)-(ii) described above. Third, we account for how  $x$  changes (stochastically) with  $n$ .  
97 This considers factors (iii)-(iv) and depends on the prevalence of infection in the population as  
98 well as the size-biased importation rate of infections into the event,  $\epsilon(n)$ , which is influenced  
99 by the spectrum of risk appetites about that prevalence.

100 The functional dependence of  $\epsilon$  on  $n$  serves as a parsimonious model of risk awareness and  
101 allows us to assess how host behaviour shapes the risk of superspreading (e.g., if  $\epsilon(n)$  is an

102 increasing function of  $n$ , then this implies a higher infection import rate into larger events). We  
103 explore our central hypothesis by comparing the relative and combined impact of  $\epsilon(n)$  and  $k$   
104 on the tail probability of observing a disproportionately large number of secondary infections  
105  $y$  at an event. We demonstrate, for a fixed overall import rate (equalling the wider population  
106 prevalence), that risk awareness can substantially amplify the chances of superspreading at  
107 a large event, compared to the scenario in which all individuals attending the large event are  
108 assumed to have similar perceptions of infection risk. This pattern holds regardless of  $k$  and,  
109 in some instances, we find that the increase in superspreading risk from risk-aware behaviour  
110 outweighs that from inherent transmission heterogeneity.

## 111 **Methods**

### 112 ***Event reproduction numbers including import risk and transmission heterogeneity***

113 We develop a framework for quantifying the risk of acquiring infection at an event (e.g., a party,  
114 concert, sports match), based on a small-scale (within-event) reproduction number. We detail  
115 this below but also sketch the main steps of our methodology and list key notation in **Fig 1**.  
116 An event is defined as a short-term grouping of  $n$  people and we allow  $0 \leq x \leq n$  of the  
117 individuals attending the event to be infectious. Initially, there are  $x$  introductions (i.e., imported  
118 infections) at this event and  $n - x$  susceptible hosts. We assume no prior immunity in the  
119 population and let  $\mathbf{P}(y|n)$  be the probability of  $0 \leq y \leq n - x$  new infections being generated  
120 at that event as we describe in **Eq. (1)**.

$$121 \quad \mathbf{P}(y|n) = \sum_{x=0}^n \mathbf{P}(y|x, n) \mathbf{P}(x|n). \quad (1)$$

122 This depends on  $\mathbf{P}(y|x, n)$ , the probability of  $y$  new infections occurring given the  $x$  infectious  
123 individuals initially (for events of size  $n$ ) and the prior probability of those  $x$  imports,  $\mathbf{P}(x|n)$ .  
124 We define the small-scale reproduction number for this event as  $R(x) \stackrel{\text{def}}{=} x^{-1} \mathbf{E}[y|x, n]$ , with  
125 the expected number of infections generated by  $x$  imports denoted by  $\mathbf{E}[y|x, n]$ . We expand  
126 this to obtain **Eq. (2)** below.

$$127 \quad R(x) \stackrel{\text{def}}{=} \frac{1}{x} \sum_{y=0}^{n-x} y \mathbf{P}(y|x, n). \quad (2)$$

128 Here  $R(x)$  measures the expected number of new infections generated by each import when  
129 there are  $x$  imports in total. Although intuitive, this reproduction number formulation is novel.

130 A central idea of this study is the importance of  $\mathbf{P}(x|n)$  and its dependence on event size  $n$ .  
 131 Earlier work assumed that  $\mathbf{P}(x|n)$  depends solely on the prevalence of the infection in the  
 132 population [25], neglecting how heterogeneities in human behaviour may affect the number of  
 133 imported cases at a given event of size  $n$ . To our knowledge, alternative models for  $\mathbf{P}(x|n)$   
 134 informed by human behaviour and the influence of this behaviour on the number of infections  
 135 generated at the event have not been explored. The heterogeneity in host behaviour that we  
 136 consider relates to the spectrum of risk appetites i.e., the fact that different individuals perceive  
 137 different infection risks associated with attending an event of size  $n$ . This spectrum alters the  
 138 rate of importing infections into events, relative to the prevalence, and so modulates  $\mathbf{P}(x|n)$ .

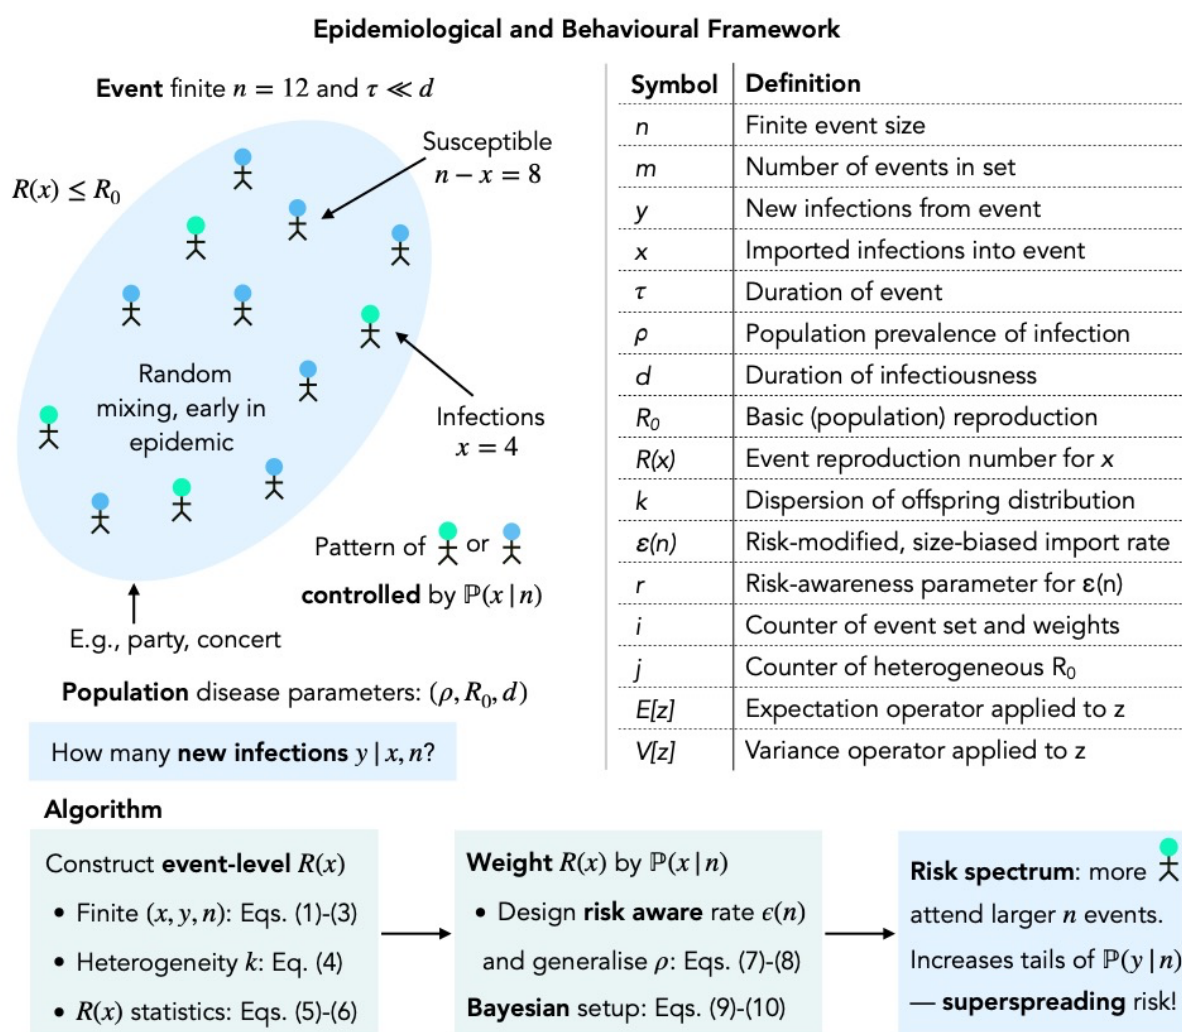

139

140 **Fig 1: Modelling framework for event-level transmission subject to risk awareness.** We  
 141 outline the central steps and define the main notation underlying our proposed framework for  
 142 modelling transmission patterns at small events. We refer to equations defined in the Methods.  
 143 This framework accounts for how heterogeneity in infection risk perception among individuals

144 modulates the number of imported cases  $x$  at an event of size  $n$  and hence contributes to the  
145 secondary infections generated at that event  $y$ .

146 Our event or small-scale reproduction number also generalises prior research by including the  
147 effects of finite  $x$  and  $n$ . Since only one generation of infection can occur at an event, this finite  
148 initial condition can strongly shape clustering patterns, underscoring the value of modelling  
149  $\mathbf{P}(x|n)$ . The original event reproduction number [24] considers a single imported infection and  
150 relates to (but is not the same as) our  $R(1)$ , which we later show is always an upper bound  
151 for  $R(x)$ . By extending the event reproduction number definition, we model the influence of  
152  $\mathbf{P}(x|n)$  on the risk of acquiring infection at any event directly. As we explain below,  $R(x)$  also  
153 embeds heterogeneity in transmission from both host characteristics as well as pathogen  
154 biology [1] and is explicitly related to the population-level basic reproduction number,  $R_0$  [27].

155 To convert **Eqs. (1)-(2)** into a computable form, we draw on characteristics of both the event  
156 and disease. We denote the (frequency-dependent) transmission rate as  $\beta$  and the expected  
157 duration of an individual infection as  $d$ , so that  $R_0 = \beta d$ . We then consider an event that lasts  
158 for time  $\tau$ , which is assumed to be substantially shorter than  $d$ , so that infectiousness outlasts  
159 the event and at most one generation of infection is possible at the event. We also assume  
160 that the event is closed i.e., for any specific event,  $n$  takes a constant value. The split of  $n$  into  
161  $x$  and  $n - x$  completely defines the epidemiologically important states for the event

162 If there is only one infected individual at the start of the event, then the probability that any  
163 susceptible host gets infected is the secondary attack rate (SAR),  $p = 1 - e^{-\frac{\beta\tau}{n}}$ , making the  
164 standard assumption that the times to infection are exponentially distributed. When there are  
165  $s$  susceptible individuals, then  $\mathbf{E}[y|1, n] = sp$ . While this assumes that all the susceptible  
166 individuals are exposed to all infectious ones at the event, we can model more realistic contact  
167 networks as in [27] by modifying  $s$  to be the subset of susceptible hosts likely to be exposed  
168 to each infection (this connects network and random mixing models).

169 We generalise this approach in three main directions. First, we model the effect of variability  
170 in the number of imported infections. If there are  $x$  imports to the event, then the SAR becomes  
171  $p = 1 - e^{-\left(\frac{\tau}{d}\right)\left(\frac{x}{n}\right)R_0}$  with  $\beta = \frac{R_0}{d}$ . Since there are initially  $s = n - x$  susceptible individuals, the  
172 expected number of infections generated at the event is  $\mathbf{E}[y|x, n] = (n - x)p$ . This leads to  
173 the event reproduction number  $R(x)$  in **Eq. (3)** below. Note that  $R(0) = R(n) = 0$ .

174 
$$R(x) = \frac{n-x}{x} \left( 1 - e^{-\left(\frac{\tau}{d}\right)\left(\frac{x}{n}\right)R_0} \right) \approx \left( 1 - \frac{x}{n} \right) \left( \frac{\tau}{d} \right) R_0 + \mathbf{O}\left(\frac{x}{n}\right). \quad (3)$$

175 This formulation has interesting limiting behaviour at various  $x$ . As the number of susceptibles  
 176 grows in excess of imports i.e.,  $\frac{n}{x}$  increases, the  $\mathbf{O}\left(\frac{x}{n}\right)$  terms in the Taylor series approximation  
 177 of  $R(x)$  in **Eq. (3)** become negligible. As  $n$  becomes large, we find  $R(x) \rightarrow \left(\frac{\tau}{d}\right)R_0$ . If the event  
 178 lasts for the duration of infectiousness ( $\tau = d$ ), then  $R(x) \rightarrow R_0$ . This convergence makes  
 179 sense since our formulation is equivalent to a finite or small-scale version of random mixing.

180 Second, we expand this model to include realistic heterogeneity from host characteristics and  
 181 pathogen biology. It is unlikely that every infectious individual has the same transmissibility  
 182 and we expect substantial variations in the numbers of infections generated by each infected  
 183 individual [1,28]. We therefore allow  $R_0$  to have some distribution from which every import is  
 184 randomly sampled and let  $R_0^j$  indicate the sample for the  $j^{\text{th}}$  of the  $x$  imports at the event. This  
 185 heterogeneous version of  $R(x)$  is in **Eq. (4)**, with expected number of infections  $\mathbf{E}[y|x, n] =$   
 186  $xR(x)$ . Note that **Eq. (4)** is of the form  $\frac{n-x}{x} p_{\text{het}}$ , with  $p_{\text{het}}$  as a heterogeneous SAR.

187 
$$R(x) = \frac{n-x}{x} \left( 1 - e^{-\left(\frac{\tau}{d}\right)\left(\frac{1}{n}\right)\sum_{j=1}^x R_0^j} \right). \quad (4)$$

188 We compute the mean of  $R(x)$  across the transmission heterogeneity for  $x$  infectious imports  
 189 in **Eq. (5)**, with  $\mathbf{E}_{\text{het}}$  indicating expectation about the distributions of the  $R_0^j$  and  $\mathbf{M}_b(a)$  as the  
 190 moment generating function about  $b$  evaluated at  $a$ . As the transmissibility of the  $x$  imported  
 191 infections are independently sampled,  $\mathbf{M}_{\sum_{j=1}^x R_0^j}(a) = \prod_{j=1}^x \mathbf{M}_{R_0^j}(a)$ . This reduces to  $\mathbf{M}_{R_0}(a)^x$   
 192 if samples are identically distributed. The expected number of infections under this model as  
 193 a function of  $x$  is  $\mathbf{E}_{\text{het}}[\mathbf{E}[y|x, n]] = x\mathbf{E}_{\text{het}}[R(x)]$  with  $\mathbf{E}_{\text{het}}[R(x)]$  from **Eq. (5)**.

194 
$$\mathbf{E}_{\text{het}}[R(x)] = \frac{n-x}{x} \left( 1 - \mathbf{M}_{\sum_{j=1}^x R_0^j} \left( \left( \frac{\tau}{d} \right) \left( \frac{1}{n} \right) \right) \right). \quad (5)$$

195 Following [28], we evaluate the variance around  $R(x)$  as  $\mathbf{V}_{\text{het}}[R(x)]$  with  $a_n = \left(\frac{\tau}{d}\right)\left(\frac{1}{n}\right)$  in **Eq.**  
 196 **(6)**. This involves expanding  $\mathbf{E}_{\text{het}}[R(x)^2] - \mathbf{E}_{\text{het}}[R(x)]^2$  and applying properties of  $\mathbf{M}_b(a)$ .  
 197 The variance on the expected number of infections is  $\mathbf{V}_{\text{het}}[\mathbf{E}[y|x, n]] = x^2\mathbf{V}_{\text{het}}[R(x)]$ . All of  
 198 these statistics remain valid for any model of transmission heterogeneity but we derive analytic  
 199 relations under the most widely used model of [1] in the subsequent section.

200 
$$\mathbf{V}_{\text{het}}[R(x)] = \left(\frac{n-x}{x}\right)^2 \left(\mathbf{M}_{\sum_{j=1}^x R_0^j}(-2a_n) - \mathbf{M}_{\sum_{j=1}^x R_0^j}(-a_n)^2\right). \quad (6)$$

201 Third, we examine how the likelihood of finding that  $x$  infectious individuals have attended the  
202 event impacts the above quantities. This involves evaluating how  $\mathbf{P}(x|n)$  weights the formulae  
203 in **Eqs. (4)-(6)**. This weighting may be random, depend on behavioural preferences as we  
204 posit in the next section (i.e., risk awareness) or be assigned using other rules. We propose  
205 that a more informative measure of the risk of acquiring infection from an event of size  $n$  and  
206 duration  $\tau$  is the import-weighted event reproduction number  $R_{\text{imp}}$  as in **Eq. (7)** below.

207 
$$R_{\text{imp}} = \sum_{x=0}^n R(x)\mathbf{P}(x|n). \quad (7)$$

208 While  $R_{\text{imp}}$  averages over the possible numbers of imports, it is still a random variable with  
209 samples taken from the distribution controlling transmission heterogeneity. Accordingly, it has  
210 statistics  $\mathbf{E}_{\text{het}}[R_{\text{imp}}]$  and  $\mathbf{V}_{\text{het}}[R_{\text{imp}}]$  that we compute by summing and weighting  $\mathbf{E}_{\text{het}}[R(x)]$   
211 and  $\mathbf{V}_{\text{het}}[R(x)]$  by  $\mathbf{P}(x|n)$  and  $\mathbf{P}(x|n)^2$  respectively. The expected number of new infections  
212  $\mathbf{E}_{\text{imp}}[y|n]$  that is associated with  $R_{\text{imp}}$  follows as in **Eq. (8)**.

213 
$$\mathbf{E}_{\text{imp}}[y|n] = \sum_{x=0}^n xR(x)\mathbf{P}(x|n). \quad (8)$$

214 Similarly, we obtain the heterogeneous statistics  $\mathbf{E}_{\text{het}}[\mathbf{E}_{\text{imp}}[y|n]]$  and  $\mathbf{V}_{\text{het}}[\mathbf{E}_{\text{imp}}[y|n]]$  but  
215 the quantities being weighted by  $\mathbf{P}(x|n)$  and  $\mathbf{P}(x|n)^2$  are now, respectively,  $x\mathbf{E}_{\text{het}}[R(x)]$  and  
216  $x^2\mathbf{V}_{\text{het}}[R(x)]$ . These all proceed from the properties of expectations and variances applied to  
217 a linear weighted sum with independent terms.

### 218 **Statistical models for event reproduction numbers and importation patterns**

219 Having outlined measures of infection risk in **Eqs. (7)-(8)**, we build into our framework some  
220 likely approaches for integrating transmission heterogeneities and import patterns (including  
221 when those imported infections are risk-sensitive). This allows us to parsimoniously model  
222 traditional and behavioural drivers of superspreading. Additionally, we incorporate process  
223 stochasticity and provide a full Bayesian formulation for our framework. We start by including  
224 the seminal heterogeneity model of [1], which describes individual variations in transmissibility  
225 via a gamma distribution with dispersion  $k$  and mean  $R_0$ . We write this as  $R_0^j \sim \mathbf{Gam}\left(k, \frac{R_0}{k}\right)$



226 with **Gam** as a shape-scale parameterised gamma distribution. Using scaling and summing  
227 properties of these gamma variables, we hence obtain  $\sum_{j=1}^x R_0^j \sim \mathbf{Gam}\left(kx, \frac{R_0}{k}\right)$ .

228 This assumes that samples of the basic reproduction number of individuals are independent  
229 and identically distributed and lets us analytically evaluate the moment generating function as

230  $\mathbf{M}_{\sum_{j=1}^x R_0^j}(-a_n) = \left(1 + \frac{R_0 a_n}{k}\right)^{-kx}$ . We substitute this into **Eqs. (4)-(6)** to precisely compute the

231 mean and variance of the infections and event reproduction number conditional on a total of

232  $x$  introductions as detailed above. We can relax the assumption that the  $R_0^j$  are independent

233 and identically distributed by instead sampling them from different distributions or by applying

234 alternative dispersion models [28]. The heterogeneous  $R_0^j$  constitute a major and traditionally

235 modelled source of stochasticity underpinning the risk metrics we propose in **Eqs. (7)-(8)**.

236 A less studied source of stochasticity is variability in the probability that infectious individuals

237 attend the event. Previous work [25] has treated this deterministically, setting the probability

238 or rate that an attending individual is infected as equal to the population prevalence  $\rho$  (or  $\rho$

239 adjusted by an exposure factor when it is known that the event draws individuals who are less

240 or more likely to be infected). This is modelled as  $x \sim \mathbf{Bin}(n, \rho)$ , with **Bin** indicating a binomial

241 distribution. We generalise this under our behavioural hypothesis. We posit, for a fixed overall

242 importation level, that this import probability increases with  $n$ . This models risk awareness, in

243 which risk-averse individuals who are less likely to be infected avoid larger events, or equally

244 the individuals attending larger sized events are less risk-averse and more likely to be infected.

245 Risk appetites may also depend on event duration  $\tau$ , but we do not explore this here.

246 We model event size bias using sorted Dirichlet weightings. We consider  $m$  events, the  $i^{\text{th}}$  of

247 which has size  $n_i$  and import rate  $\epsilon(n_i)$ . Sizes sequentially span all integers from  $n_{\min}$  to  $n_{\max}$

248 uniquely (i.e.,  $n_{\max} = n_{\min} + m - 1$ ) but we can relax this to include any distribution across

249 event sizes of interest. We fix the total importation rate across all  $m$  events. This constrains

250  $\sum_{i=1}^m n_i \epsilon(n_i) = \rho \sum_{i=1}^m n_i$ , conserving the total number of infections introduced across events

251 so that the mean importation rate equals  $\rho$ . We enforce this constraint to allow fair comparison

252 between the conventional model, in which all imports occur with rate  $\rho$ , and our size-biased

253 variations, which describe how variability in perceived risk by hosts affect their attendance at

254 events. This constraint causes some event sizes to have importation rates above and others

255 below  $\rho$  and allows us to model a spectrum of risk appetites about the baseline prevalence.

256 This variability in risk perception aligns well with trends found in behavioural surveys [12–14].

257 The  $\epsilon(n_i)$  values encode our event size biases. We construct them by first sampling a set of  
 258 random weights  $\{w_i\}$  from a symmetrical Dirichlet distribution i.e.,  $\{w_i\} \sim \mathbf{Dir}(r)$  with  $r$  as a  
 259 shape parameter applied to every  $w_i$  and  $\sum_{i=1}^m w_i = \rho$ . The  $\{w_i\}$  set spans all  $m$  weights with  
 260 smaller values of  $r$  leading to more skewed weightings. At very large  $r$ ,  $w_i \approx \frac{\rho}{m}$  for all  $i$ . To  
 261 model risk-awareness, where we expect that less risk-averse individuals are more likely to  
 262 attend larger  $n_i$  events relative to more risk-averse individuals, we sort the  $\{w_i\}$  in ascending  
 263 order so that  $w_i$  increases with  $n_i$ . We replicate this procedure across many runs to include  
 264 variability from the Dirichlet distribution. For every sampled, sorted  $\{w_i\}$ , we define  $\epsilon(n_i) \stackrel{\text{def}}{=} w_i n_i^{-1} (\sum_{l=1}^m n_l)$ .  
 265 This satisfies our benchmarking constraint and parsimoniously models the  
 266 spectrum of risk appetites across the host population.

267 We conceptualise this constraint by observing that in the conventional model  $\mathbf{E}[x_i] = n_i \rho$  for  
 268 the  $i^{\text{th}}$  event so that  $\sum_{i=1}^m \mathbf{E}[x_i] = \sum_{i=1}^m n_i \rho$  imports occur into all  $m$  events on average. In our  
 269 risk-aware model  $\mathbf{E}[x_i] = n_i \epsilon(n_i)$  and so we chose the  $\epsilon(n_i)$  to ensure  $\sum_{i=1}^m n_i \epsilon(n_i)$  equals  
 270 the  $\sum_{i=1}^m \mathbf{E}[x_i]$  from the conventional model. However, we can relax this constraint to describe  
 271 when risk awareness itself changes the prevalence (provided we use updated values at time  
 272 snapshots) and we can generalise the model to allow  $r$  to also be size dependent (i.e.,  $r(n_i)$ ).  
 273 In summary, we generate import rates that are size biased (with this bias accounting for risk  
 274 awareness) and use a single parameter  $r$  to set the strength of this behavioural effect.

275 Integrating the above models for heterogeneity and importation, we complete our algorithm  
 276 (see **Fig 1**) for sampling import weighted distributions of event size risk using **Eqs. (1)-(2)**. We  
 277 formulate this in **Eqs. (9)-(10)** with semi-colons discriminating between probabilities that we  
 278 evaluate from a distribution and parameters specifying that distribution. For convenience, we  
 279 use  $S_x = \sum_{j=1}^x R_0^j$  for denoting heterogeneous samples and  $\epsilon(n)$  for general size bias.

$$280 \quad \mathbf{P}(y|n, x) = \int_0^\infty \mathbf{Bin}\left(y; n - x, \left(1 - e^{-\frac{\tau S_x}{d n}}\right)\right) \mathbf{Gam}\left(S_x; kx, \frac{R_0}{k}\right) dS_x. \quad (9)$$

$$281 \quad \mathbf{P}(y|n) = \int_0^1 \sum_{x=0}^n \mathbf{P}(y|n, x) \mathbf{Bin}(x; n, \epsilon(n)) \mathbf{P}(\epsilon(n)|n) d\epsilon(n). \quad (10)$$

282 We use the probability distributions in **Eqs. (9)-(10)** together with the definitions of **Eqs. (1)-**  
 283 **(2)** to compute the measures of event risk that we propose in **Eqs. (7)-(8)**. These marginalise  
 284 over the distributions of import rate and transmission heterogeneity, which are degenerate  
 285 when  $\epsilon(n)$  is constant for all  $n$  or all  $R_0^j = R_0$ , respectively. In the Results, we examine the

286 properties of our computational framework and apply it to explore how behaviour affects  
287 superspreading. Our framework is freely available at: <https://github.com/kpzoo/smallScaleR>.

## 288 **Results**

289 In the Methods, we developed a framework to assess the risk of acquiring infection at an event  
290 by deriving a small-scale reproduction number and the expected number of infections that will  
291 occur at the event. Both measures depend on the levels of heterogeneity in transmission and  
292 variability in the rate at which infectious individuals are likely to attend the event (i.e., imports).  
293 Here we examine the influence of these two key factors in determining outbreak patterns.

### 294 ***Superspreading risk depends on importations and dispersion***

295 Much research has investigated how heterogeneity in transmission can cause superspreading  
296 and hence increase the number of infections likely to result from a gathering or event [1,23].  
297 Specifically, there has been study of how the dispersion parameter  $k$  modulates the risk of  
298 superspreading events [26,28,29]. Generally, smaller values of  $k < 1$  are predictive of larger  
299 transmission heterogeneity and superspreading risk. However, the influence of the number of  
300 importations  $x$  at an event of size  $n$  has received relatively little attention. We examine this by  
301 computing the statistics derived in **Eqs. (4)-(6)**, in which we defined the reproduction number  
302  $R(x)$  as a function of the imports and the resulting number of expected infections  $\mathbf{E}[y|x, n]$ .

303 We consider an event of size  $n = 30$  over a range of dispersions  $0.1 \leq k \leq 10$  with a large-  
304 scale limit (see **Eq. (3)**) of  $\left(\frac{\tau}{d}\right) R_0 = 0.3$ . We sample  $R(x)$  and  $\mathbf{E}[y|x, n]$  from heterogeneous  
305 gamma distributions describing the transmissibility of the sum of all imported infections (see  
306 Methods) and compute statistics from these samples using **Eqs. (5)-(6)**. We plot these results  
307 in **Fig 2** to explore the properties of these statistics. Interestingly, we find  $R(x)$  is a decreasing  
308 function of  $x$ , even though every  $R(x)$  has the same limit of  $\left(\frac{\tau}{d}\right) R_0$ . The single import scenario  
309 of  $R(1)$  relates to the event reproduction number proposed in [24]. If we assume, as in several  
310 branching process models, that all imports have reproduction number  $R(1)$  instead of  $R(x)$ ,  
311 then  $\mathbf{E}[y|x, n]$  and the risk of acquiring infection at the event may be notably overestimated.

312 Further, increasing heterogeneity (decreasing  $k$ ) increases the variance of our statistics but  
313 decreases mean risk as we see from the inversion of the rank of blue to red curves between  
314 top and bottom panels in **Fig 2**, with  $\mathbf{VM}[\cdot]$  as the ratio of variance to mean. Last, we see that  
315 the dependence of our statistics on the number of imports is substantial and can be as critical  
316 as the value of  $k$  for describing spread. The value of  $x$  that leads to the largest possible (peak)

317 number of secondary infections at the event is not obvious (and not inferable from  $R(x)$ ) as  
 318 imports both cause infections and reduce the available susceptible individuals. In Supplement  
 319 **Fig S1** we show how this peak changes and that the mean risk difference can be appreciable  
 320 in different settings. This underpins the importance of modelling finite event sizes and signifies  
 321 that a crucial factor driving the risk of acquiring infection at an event is the import distribution  
 322  $\mathbf{P}(x|n)$ , which is rarely studied.

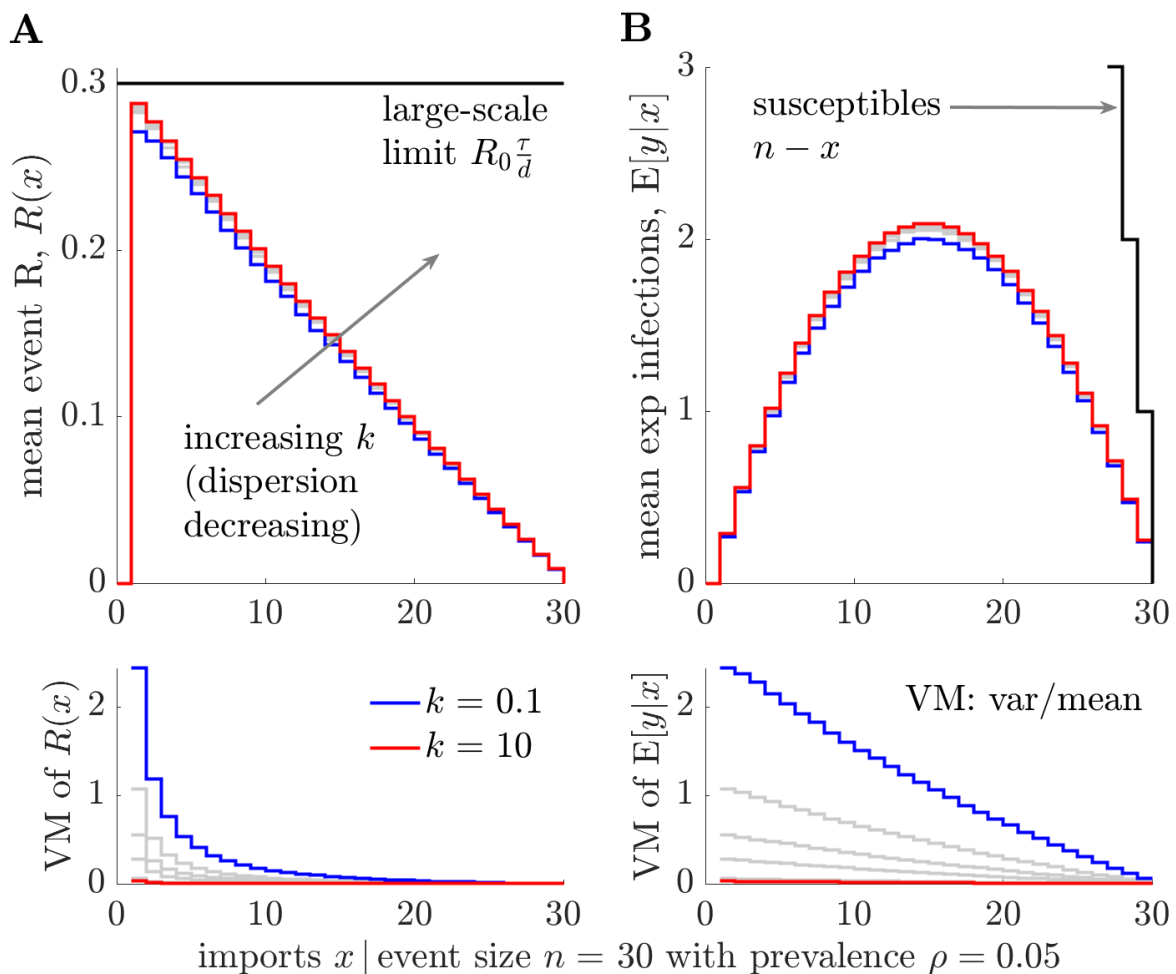

323

324 **Fig 2: Risk statistics for an event with heterogeneous transmission.** We plot the mean  
 325 ( $\mathbf{E}[\cdot]$ , top subfigures) and variance to mean ratio ( $\mathbf{VM}[\cdot]$ , bottom subfigures) of the small-scale  
 326 event reproduction number  $R(x)$  (panel A) and the mean count of new infections  $\mathbf{E}[y|x, n]$   
 327 (panel B) as a function of the number of imports  $x$ . We compute these via **Eqs. (4)-(6)** and  
 328 compile statistics over  $10^5$  samples from heterogeneous offspring distributions with dispersion  
 329 parameter  $k$  ranging from 0.1 to 10 (increasing from blue to red, with grey depicting all  
 330 intermediate values). For comparison, we show the large-scale reproduction number  $\left(\frac{\tau}{d}\right) R_0$

331 and the number of initial susceptible individuals at the event,  $n - x$ . We repeat this analysis  
332 at a larger value of  $\left(\frac{\tau}{d}\right) R_0 = 3$  in Supplement **Fig S1**.

### 333 ***Population prevalence modulates the superspreading potential at events***

334 Having observed the importance of the number of imports,  $x$  when assessing the transmission  
335 risk at events, we explore the influence of the distribution of introductions to the event,  $\mathbf{P}(x|n)$ .  
336 Conventionally [25],  $\mathbf{P}(x|n)$  can be defined as a binomial distribution with the probability of an  
337 import being equal to the prevalence of the infection in the wider population,  $\rho$ . This is our null  
338 model, and we explore how it integrates with our proposed event statistics (see **Eqs. (4)-(8)**).  
339 We consider epidemics in their initial stages i.e., there is no vaccination- or infection-acquired  
340 immunity, so  $\rho$  is small and there are  $n - x$  susceptible individuals at the event. We maintain  
341 parameter settings from **Fig 2** but weight samples of small-scale reproduction numbers and  
342 mean numbers of imported infections using  $\mathbf{P}(x|n)$ , which is  $\mathbf{Bin}(x; n, \rho)$  with  $\rho$  ranging from  
343 0.01 – 0.1 (1–10%). We compute histograms and statistics of these samples in **Fig 3**.

344 We examine homogeneous ( $k = 10$ ) and heterogeneous ( $k = 0.1$ ) dispersion levels and plot  
345 the log survival (or tail) probabilities of realised numbers of new infections  $y$  and associated  
346 small-scale event reproduction numbers  $R$  in panels A-B of **Fig 3** for different values of  $\rho$ . We  
347 compute these probabilities via **Eqs. (7)-(8)**. Larger values for these probabilities respectively  
348 indicate that superspreading is more likely (i.e., disproportionately more infections than  
349  $\mathbf{E}_{\text{het}}[\mathbf{E}_{\text{imp}}[y|n]]$  occur) and that imports have increased potential to cause superspreading  
350 (i.e., transmissibility above  $\mathbf{E}_{\text{het}}[R_{\text{imp}}]$ ). This distinction is rarely explored because it is less  
351 important at population levels, where superspreading models are commonly used [1,26,28].  
352 However, the limiting finite-size effects of events make this distinction crucial. Histograms of  
353 samples of the infections at the event for some of the values of  $\rho$  in A-B are shown in **Fig 3C**.

354

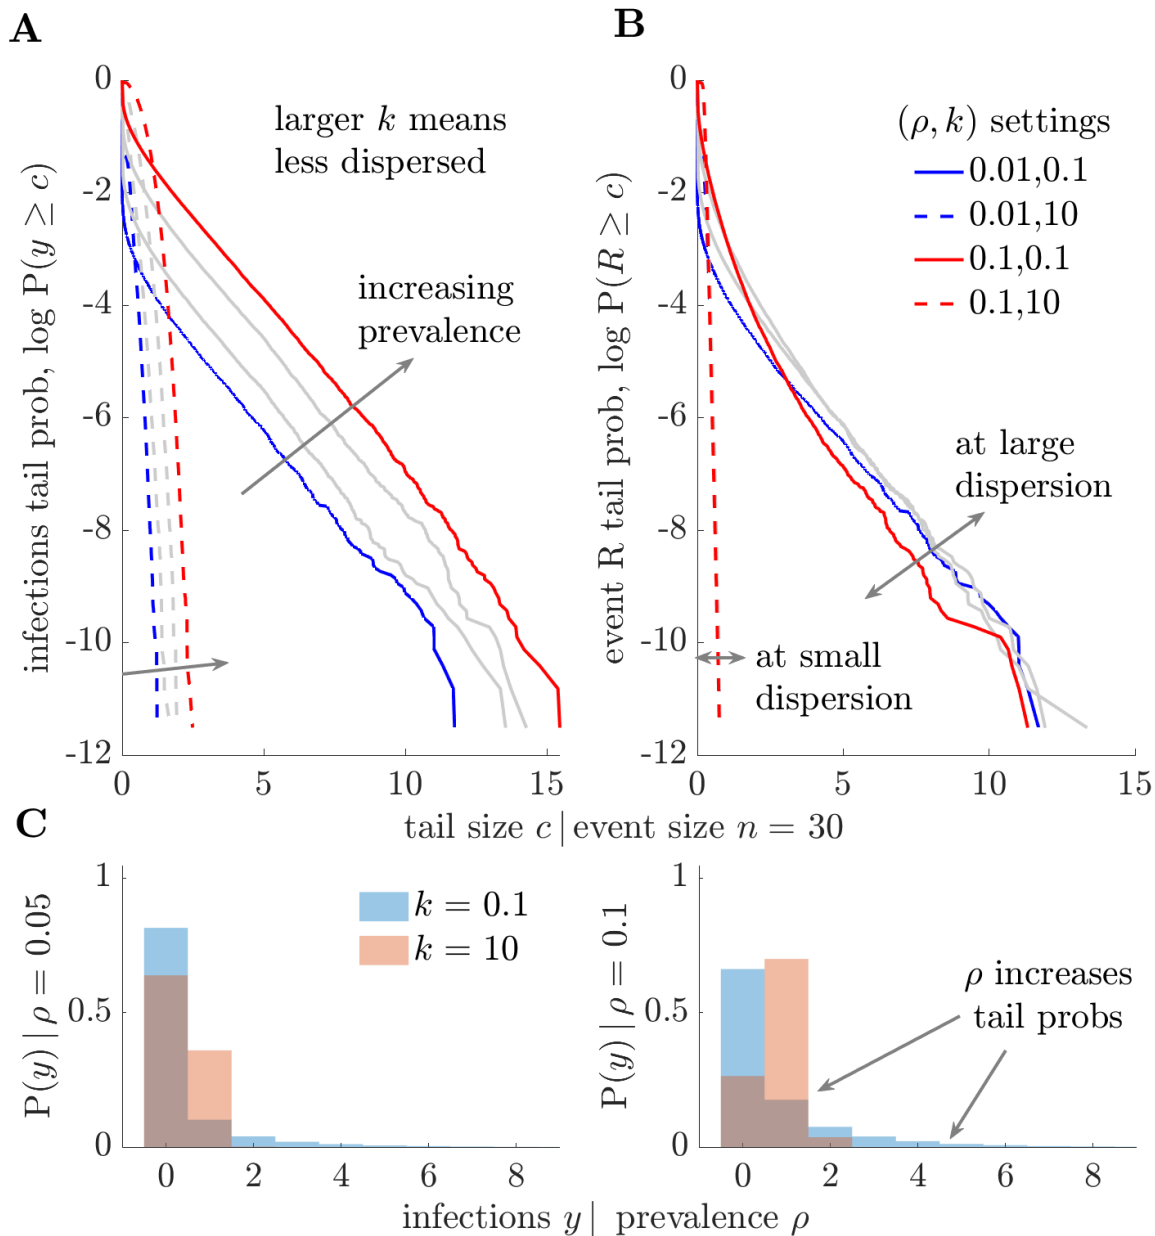

355

356 **Fig 3: The importation rate magnifies the effects of heterogeneous transmission.** We  
 357 plot the log survival probabilities for the number of new infections  $y$  (panel A) and related event  
 358 reproduction numbers  $R$  (panel B). We account for the probability of  $x$  imports (distributed as  
 359  $\text{Bin}(x; n, \rho)$ ) at an event of size  $n = 30$  with the population prevalence as  $\rho$  (increasing from  
 360 blue to red with grey indicating intermediate values). Larger  $P(y \geq c)$  signifies more realised  
 361 heterogeneity (higher likelihoods that disproportionate numbers of infections result from the  
 362 event), while larger  $P(R \geq c)$  signifies more heterogeneity in transmissibility (higher potential  
 363 for superspreading events). In panels A-B, dashed curves are for  $k = 10$  (spread is mostly  
 364 homogeneous) and solid curves are for  $k = 0.1$  (spread is heterogeneous). We compute  
 365 these quantities from **Eqs. (4)-(8)**. Panel C shows histograms of  $10^5$  samples of  $y$  at two  $\rho$

366 values underpinning panels A-B. Thicker tails or more rightwards mass in these distributions  
367 indicate a higher chance of a large number of infections at the event. We repeat this analysis  
368 at a larger event size of  $n = 100$  in Supplement **Fig S2** for comparison.

369 We find that increasing prevalence ranks the  $y$  survival curves for both  $k$  scenarios (panel A)  
370 (at a given threshold tail size  $c$ , probabilities increase with  $\rho$ ) but has limited impact on the  $R$   
371 curves (panel B). The latter trend is expected as  $\rho$  does not change transmissibility. However,  
372 the fact that prevalence alone can mediate realised superspreading risk is important and, to  
373 our knowledge, unexplored. We confirm this with the histograms of panel C, which have thicker  
374 tails or at least more rightward probability mass as  $\rho$  grows (even at large  $k$ ). The variances  
375 of the  $y$  values (not shown) also rise with  $\rho$ . We show equivalent analyses for a larger sized  
376 event ( $n = 100$ ) in Supplement **Fig S2** and recover similar results. The rate at which infections  
377 are introduced is therefore critical to assessing the chances of superspreading at event.

378 The risk of superspreading is a key determinant of whether cases of disease at the beginning  
379 of an outbreak will lead to a major epidemic because local infection clusters can propagate  
380 forward, snowballing into wider waves of infections. In standard models, the  $R$  survival curves  
381 correlate strongly with those of  $y$  [1,28]. However, the added variation we see in the  $y$  curves  
382 in **Fig 3** highlights that superspreading risk is above that expected from  $R$  alone and, further,  
383 that chances of stochastic extinction are reduced (the histograms show  $\mathbf{P}(y = 0)$  falling with  
384  $\rho$ ). Understanding the interaction between the import rate (determined by the prevalence) and  
385 finite event size effects is therefore essential for accurately inferring the risk of superspreading  
386 at an event and hence the chance of epidemic establishment. Next, we demonstrate that the  
387 realised superspreading risk can further rise if risk awareness affects event attendance.

### 388 ***Risk awareness controls importation rates and amplifies superspreading risk***

389 We previously assumed that the importation rate into an event was small, constant and equal  
390 to the population infection prevalence  $\rho$ . However, this is unrealistic as event attendance will  
391 depend on individual preferences. Data have found that individual perceptions of infection risk  
392 can regulate transmission dynamics and that a spectrum of risk appetites exist in a population  
393 [13,30,31]. Many models couple behavioural changes to prevalence [10,17] and prevalence  
394 elasticity, in which self-protective behaviours vary with prevalence, have been observed. We  
395 hypothesise, for a fixed prevalence baseline, that heterogeneity in individual risk perception  
396 (i.e., the risk spectrum) may mean that risk-averse individuals avoid larger events where they  
397 expect higher chances of becoming infected. Events with large numbers of attendees are then

398 disproportionately likely to be attended by less risk-averse individuals (those with large risk  
399 appetites), who have higher chances of introducing infection to the event.

400 We explore this idea by altering the null model from the above section in which the probability  
401 that an event attendee is already infected is  $\rho$ . We propose a size-biased model where risk  
402 appetite or awareness adjusts the event-scale rate of importation based on event size  $n$ . We  
403 realise this using weights that assign a rate  $\epsilon(n)$  that scales with  $n$  (see Methods) but ensures  
404 the total infections imported into all events is conserved on average i.e., overall transmission  
405 levels are constrained. We consider a set of  $m$  events, the  $i^{\text{th}}$  of which has size  $n_i$ . The weight  
406  $w_i$  is set to increase with  $n_i$  but satisfies  $\sum_{i=1}^m w_i = \rho$ . The skew of the  $w_i$  i.e., strength of the  
407 size-bias, is controlled by the parameter  $r$ . We apply this model with differing weight strengths  
408  $r$  using **Eqs. (9)-(10)** and under the parameter settings from **Fig 3**, to obtain **Fig 4**.

409 In **Fig 4**, we study weight choices characterising two risk-awareness levels (green and red),  
410 in which the probability that an attendee is an imported infection increases with the event size,  
411 a relatively risk-stable case (blue) and a null model (black, dashed) completely neglecting risk-  
412 awareness. We show corresponding import rates in panel A of **Fig 4** and compute a critical  
413 event size  $n^*$ , at which  $\epsilon(n)$  is closest to  $\rho$ . For the risk-aware models (green and red), events  
414 above this size have higher infection risk than assumed by conventional (null) models. In  
415 panels B-C, we illustrate that size-biasing substantially amplifies the mean and variance of the  
416 number of infections  $y$ , doubling or tripling the risks at larger events, relative to the null model  
417 (see insets), for the risk strength parameters and constraints we consider. This amplification  
418 outweighs the suppression of infections at smaller events as well as susceptible depletion  
419 caused by imports and signifies that risk awareness can strongly shape infection patterns. Our  
420  $\epsilon(n)$  constraints limit variations in the total mean infections across events (panel D).



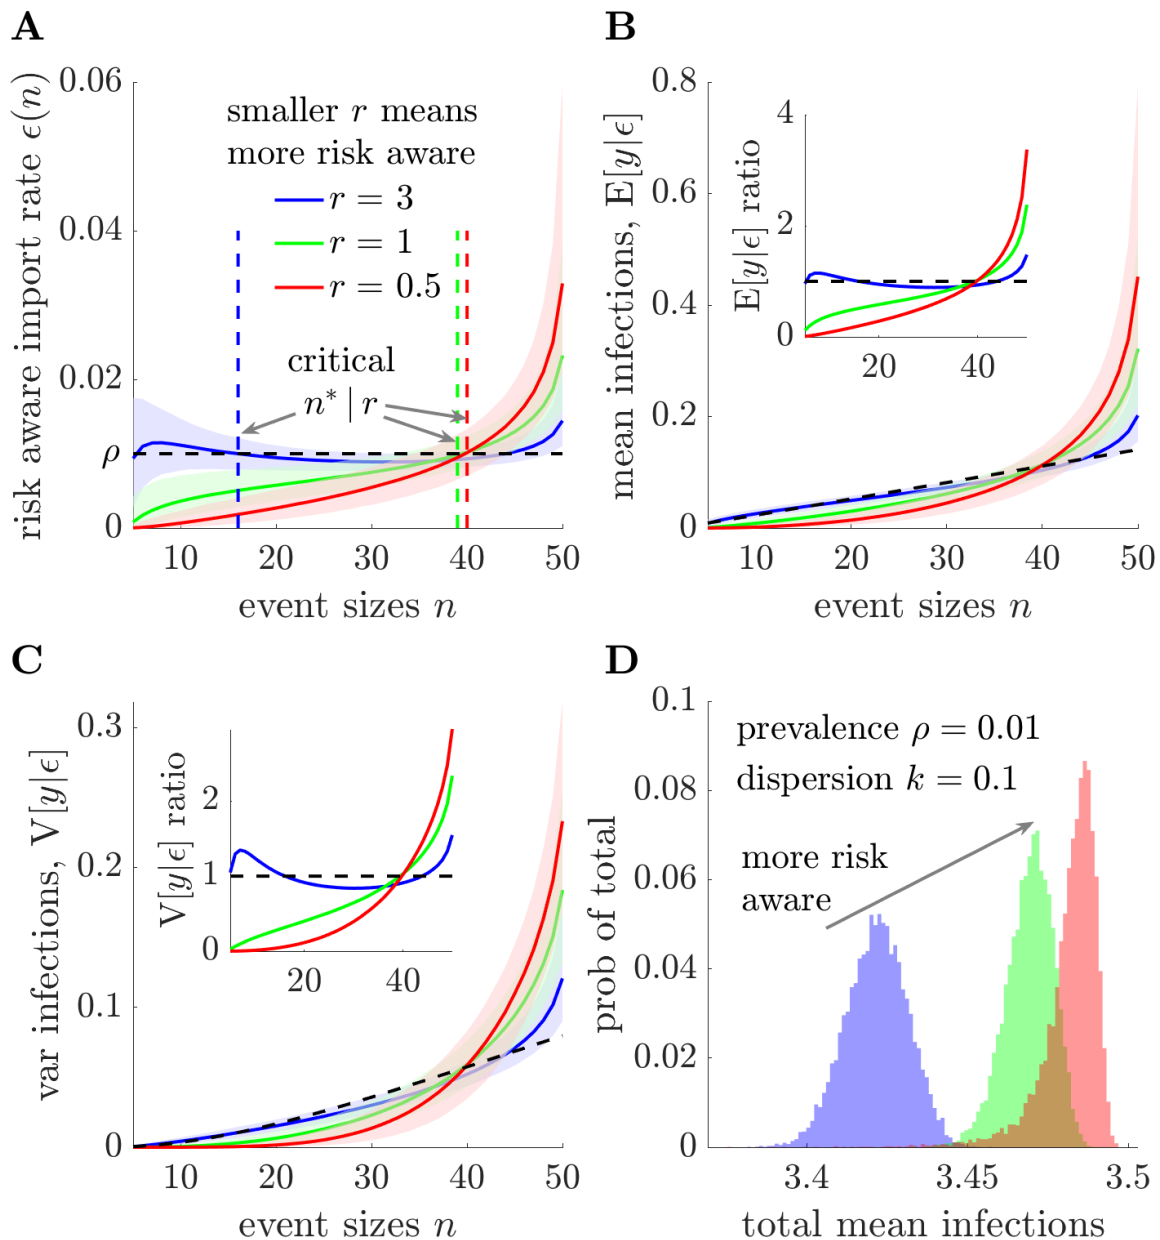

421

422 **Fig 4: Event size bias substantially elevates the risk of infection.** We compare the risk of  
 423 acquiring infection at an event under models with size-biased import rates due to variability in  
 424 risk perception against a null model with constant importation rate at the prevalence  $\rho$ . Panel  
 425 A shows the size-biased rates  $\epsilon(n)$ , parametrised by  $r$ , for  $m = 46$  events with sizes spanning  
 426 5: 50. Smaller  $r$ , decreasing from blue to green to red, indicates more skewed  $\epsilon(n)$  functions  
 427 but conserves the overall infection import rate. The critical event size  $n^*$  demarcates when  
 428  $\epsilon(n)$  is closest to  $\rho$  (risk neutral event sizes). Panels B-C illustrate the resulting mean and  
 429 variance of the number of infections at an event ( $E[y|\epsilon]$ ,  $V[y|\epsilon]$ ) relative to the equivalent  
 430 quantities from the null model ( $E[y|\rho]$ ,  $V[y|\rho]$ ) for dispersion parameter  $k = 0.1$ . In panels A-  
 431 C, we show medians with 95% credible intervals as computed using **Eqs. (7)-(10)**. These

432 marginalise over  $10^4$  samples from the distributions of transmission heterogeneity (controlled  
 433 by  $k$ ) and number of importations (controlled by  $\rho$  and  $\epsilon(n)$ ). We also provide ratios of the  
 434 means of these plots for panels B-C as insets. Panel D shows the total mean number of  
 435 infections over all events, which remains mostly stable due to our  $\epsilon(n)$  constraints.

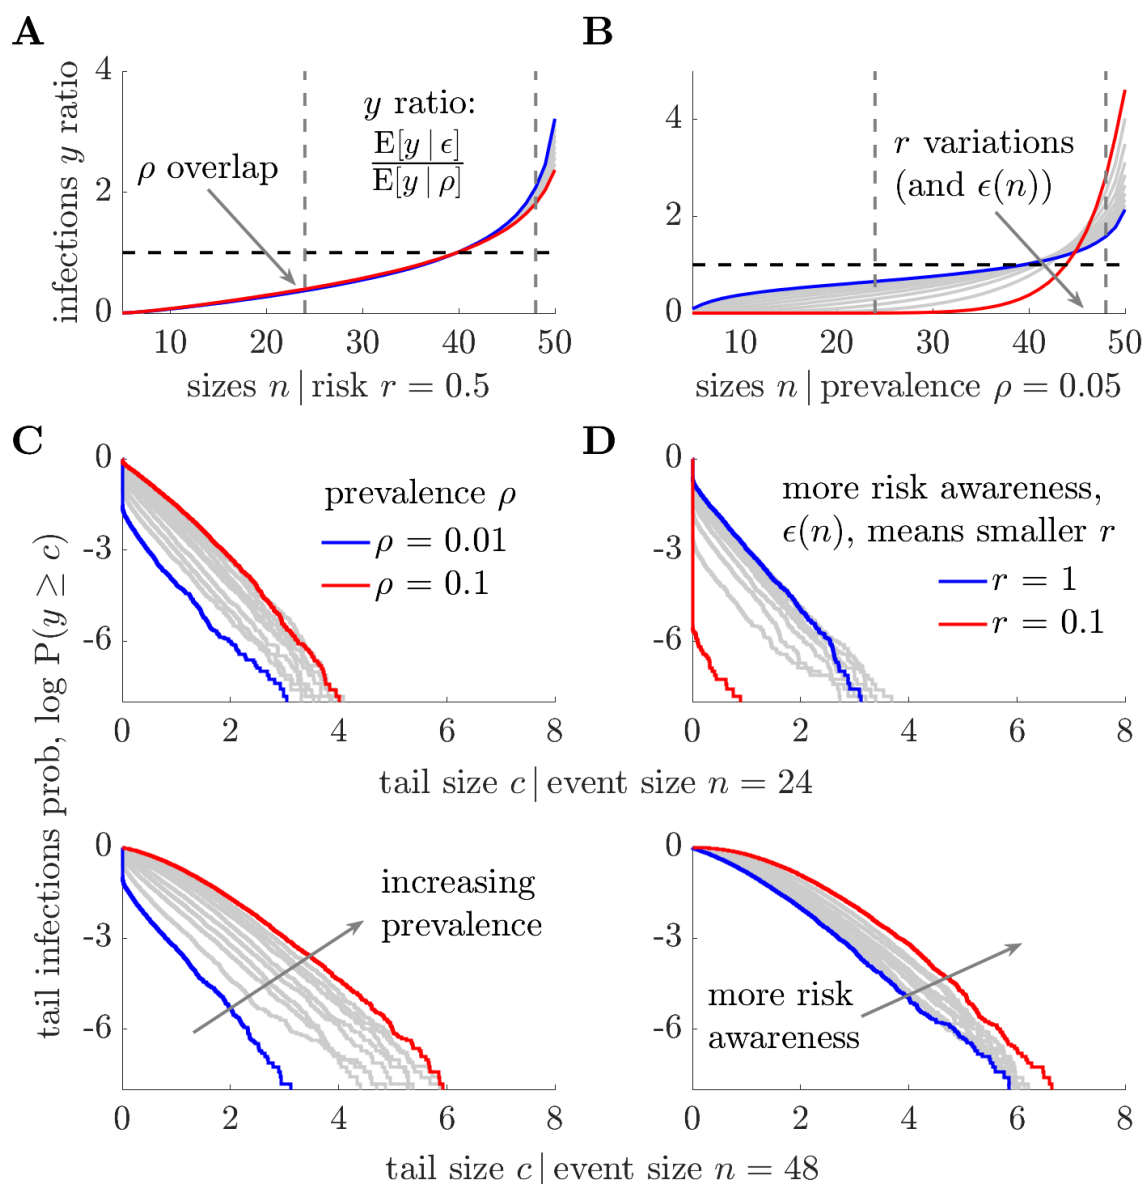

436

437 **Fig 5: Superspreading risk increases with risk awareness.** We repeat the analyses in Fig  
 438 4 but for varying prevalence rates  $\rho$  at a given risk-awareness strength  $r = 0.5$  in panel A and  
 439 for differing strengths at prevalence  $\rho = 0.05$  in panel B. These show mean numbers of  
 440 infections  $E[y|\epsilon]$  under risk-aware models relative to that from the null model  $E[y|\rho]$  (we plot  
 441 only medians of distributions for dispersion parameter  $k = 0.1$ ). We demonstrate how risk  
 442 awareness modulates the risk of superspreading at a medium and large sized events (dashed

443 vertical lines in panels A-B) by exploring tail infection survival probabilities  $\mathbf{P}(y \geq c)$  in panels  
444 C-D. See Supplement **Fig S3** and **Fig S4** for further accompanying simulations and statistics.

445 We show the underlying mean, variance and VM ratios of the small-scale, event reproduction  
446 numbers as well as VM ratios for infections in Supplement **Fig S3**. These support the trends  
447 in **Fig 4**. We also repeat this analysis for epidemics with homogeneous spread ( $k = 10$ ) in  
448 Supplement **Fig S4**. Interestingly, while the variance in the number of infections is smaller, the  
449 ratios of the means and variances among risk aware and the null model (panels B-C of **Fig**  
450 **S4**) are similar and rise with  $n$ , indicating that risk awareness alone can introduce additional  
451 superspreading risk. These results (with **Fig 3**) mean that neglecting the risk spectrum within  
452 host populations, as is done in conventional models where the probability that an attendee is  
453 initially infected is set solely by the prevalence  $\rho$ , can lead to substantial underestimation of  
454 the likelihood of superspreading.

455 We confirm this in **Fig 5**, where we illustrate how log survival or tail probabilities of infections  
456 ( $\log \mathbf{P}(y \geq c)$ ) change with the risk awareness strength  $r$  and  $\rho$ . In panel A, we fix  $r$  and find  
457 that the median risk of infections, relative to the null risk-neutral model, is largely unchanged.  
458 This verifies that the skew of the size-bias from risk awareness is a key variable. In panel B,  
459 we see how median relative risk at larger events increases with risk awareness levels (i.e., as  
460  $r$  falls), for fixed  $\rho$ . We highlight two event sizes  $n = (24, 48)$ , which have relative risks below  
461 and above 1 (dashed lines in A-B) and examine their tail probabilities in panels C-D. In C we  
462 find that, for both sizes, superspreading risk rises with prevalence as tail probabilities at any  
463 threshold  $c$  scale with  $\rho$ . In D we note that risk awareness at a given prevalence can reduce  
464 likelihood of superspreading at smaller events but considerably amplify the superspreading  
465 risk at larger events (seen as an inversion in the ranking of curves from blue to red).

466 Across our simulations, this amplification from host behaviours can be as much as tenfold (2-  
467 2.5 natural log units in the tail probabilities at  $4 \leq c \leq 6$  in panel D at  $n = 48$ ). We reinforce  
468 these conclusions by computing the associated statistics of new infections (panel A) and our  
469 small-scale reproduction numbers (panel B) in **Fig 6**. There we verify that the mean and  
470 variance of the number of infections grow with prevalence and the variability in risk awareness  
471 within the population, but that the realised heterogeneity is not inferable from the heterogeneity  
472 in reproduction numbers. Consequently, the population risk spectrum can independently drive  
473 increased superspreading risk at larger events that may have critical ramifications because  
474 larger events can support more infections and contribute disproportionately to the  
475 establishment of infection in the host population early in an epidemic. As a result, accurate  
476 characterisation of small-scale behavioural patterns, in combination with estimation of both

477 the wider-scale prevalence of infection in the population and transmission heterogeneities, are  
 478 integral to correctly quantifying the risk of superspreading.

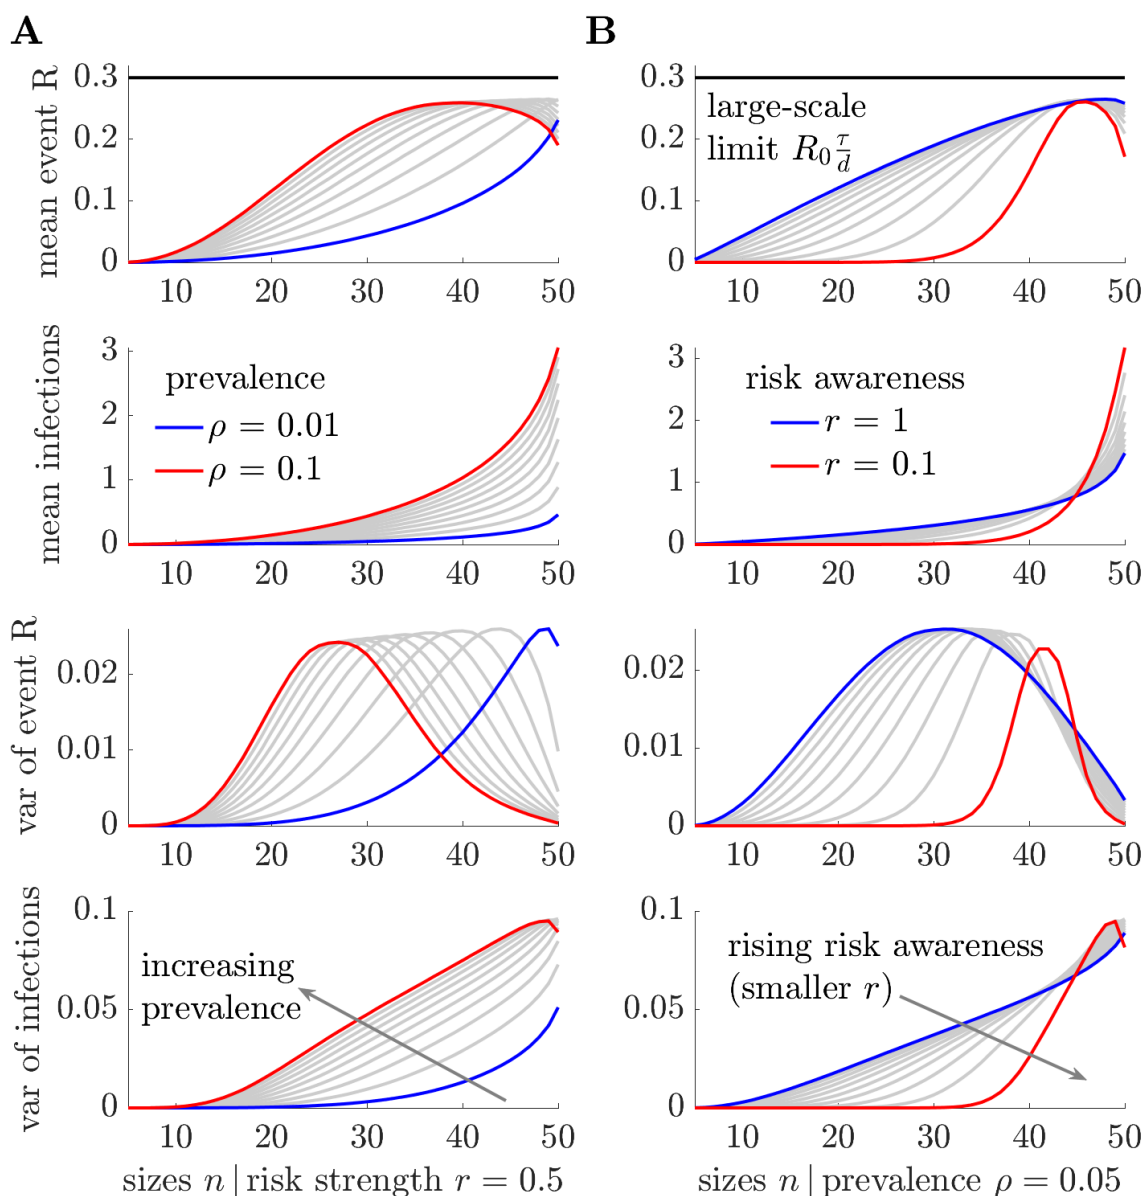

479

480 **Fig 6: Risk awareness is the key driver of superspreading risk at large events.** We  
 481 expand on the results in **Fig 5** (using the same parameter values) and compute the mean and  
 482 variance of the small-scale reproduction number  $R$  and the number of infections at the event  
 483  $y$ . Panel A plots these for differing prevalence  $\rho$  at fixed risk-awareness strengths  $r$  (smaller  
 484 values indicate stronger risk awareness), while B varies  $r$  at fixed  $\rho$ . Increasing  $\rho$  leads to a  
 485 higher mean number of infections and more variation in the number of infections. Decreasing  
 486  $r$  reduces the mean as well as the variance in the number of infections at smaller events but  
 487 amplifies them at larger events, increasing the risk of superspreading. The statistics of the

488 reproduction numbers do not reflect the realised numbers of infections (decreases in  
489 variances at larger event sizes occur due to saturation) confirming that variability in the risk  
490 awareness between individuals is the major driver of the event-level infection patterns.

## 491 **Discussion**

492 Human behaviour is a key driver of infectious disease outbreaks, yet it is not often considered  
493 in detail in epidemiological modelling studies. While variations in individual perceptions of the  
494 risks associated with acquiring infection are known to shape important macroscopic properties  
495 of an epidemic, such as disease incidence time series or patterns of spread [11,17,32], few  
496 studies have explored how human behaviour impacts the chances of superspreading. This  
497 phenomenon, while infrequent and seeded at small scales such as events or gatherings, can  
498 generate disproportionate numbers of infections, which can substantially influence large-scale  
499 epidemic growth and persistence, particularly during early or emergent stages [3,5,26]. Data  
500 or even models connecting the spectrum of infection risk perceptions within host populations  
501 to attendance of events are rarely available or studied [9,24]. Here we aspired to resolve this  
502 gap by investigating the effects of plausible relationships between human behaviour and event  
503 attendance on superspreading and by highlighting how small-scale behavioural data collection  
504 can be useful for improving the accuracy of epidemic modelling and hence control.

505 We developed a computational framework (**Eqs. (1)-(10)**) to model small-scale transmission  
506 at events (e.g., weddings, parties, sports matches or concerts) where superspreading may  
507 arise and individual behaviour can impact pathogen dynamics. Our framework quantifies,  
508 under a standard random mixing assumption, how finite event size effects together with  
509 heterogeneities in both the transmissibility among hosts and the rate of introductions of  
510 infections to an event, contribute to the numbers of infections generated at that event. This  
511 generalises several earlier approaches [23–25] and allowed us to define a within-event (small-  
512 scale) reproduction number that measures how importations and individual-level variations  
513 impact the transmissibility at events. Our event reproduction number  $R(x)$  meaningfully links  
514 to population-level characteristics through its convergence to  $R_0$  when the event size and  
515 duration scale asymptotically (see Methods).

516 Using  $R(x)$ , we showed that previous transmissibility metrics, whether derived from branching  
517 processes [1] or earlier event-level approaches [24], can overestimate transmission and the  
518 number of infections likely to occur at an event (**Fig 2** and Supplement **Fig S1**). This result  
519 holds for any model in which the finite supply of susceptible individuals at an event is not  
520 accounted for and is exacerbated when there are multiple imported infections, because the  
521 number of susceptible individuals that any imported case can infect falls [33]. Further, this

522 finite-size effect highlighted that it is essential to collect data on the number of infections  
523 introduced into events to accurately quantify superspreading risk (**Fig 3** and Supplement **Fig**  
524 **S2**), which we found to depend strongly on both the number of imported infections and more  
525 conventionally evaluated heterogeneities [3]. This insight hinted at one potential reason why  
526 behavioural patterns might affect the likelihood of superspreading – if risk awareness alters  
527 the distribution of infections imported into events, then it could also modulate the chances of  
528 superspreading occurring at those events.

529 We explored this possibility using a parsimonious model of human behaviour. We posited that  
530 variations in infection risk perceptions or awareness in a population might cause more risk-  
531 averse individuals to (probabilistically) avoid larger events, which they believe present a higher  
532 risk of acquiring infection. Our framework allowed us to model this as a size-biased weighting  
533 on the rate of introducing infections to an event that is a function of both the wider population  
534 prevalence and the event size. This draws on real-world observations that there is a spectrum  
535 of self-protective behaviours in host populations that are driven by prevalence baselines and  
536 heterogeneous risk perceptions [10,12,14,19,20]. Across numerous model simulations, we  
537 found, for given event sizes and fixed overall prevalence values, that risk awareness amplifies  
538 the chances of superspreading at large events (**Fig 4** and Supplement **Figs S3-4**) but limits  
539 transmission at smaller events.

540 Moreover, as either the prevalence or variability in risk awareness increases (characterised  
541 by strength parameter  $r$ ), the chances of superspreading elevate (**Fig 5** and **Fig 6**). This holds  
542 irrespective of the inherent heterogeneity in transmissibility at the event (characterised by  
543 dispersion parameter  $k$ ), which describes the impact of conventional superspreading drivers  
544 such as pathogen biology and host characteristics. Further, the mean, variance and probability  
545 of large numbers of infections at the event all support this trend. Since this amplification of  
546 within-event transmission occurs precisely at those events with the capacity to support larger  
547 numbers of infections (i.e., at larger events, where the effect of susceptible depletion when  
548 there are more imports is less), this behavioural mechanism can have major consequences.  
549 This may be especially critical during the sensitive, initial stages of potential epidemics, when  
550 increased superspreading can spur growth and trigger progression from sporadic outbreaks  
551 into sustained waves of infection [3,5].

552 Although these results underscore the importance of human behaviour in driving infectious  
553 disease outbreaks, our approach, like any mathematical modelling study, involved several  
554 simplifying assumptions. First, we assumed random mixing within events, so any susceptible  
555 individual can interact with any infectious individual with equal probability. In reality, contact

556 networks form at events, and the structure of these networks may differ with the size and type  
557 of event. While frameworks for embedding contact structure in epidemiological models exist  
558 (for example, multilayer networks can be used to link risk awareness and infection structure  
559 [32–34]), they can be complex and difficult to interpret or require high resolution data that are  
560 typically unavailable [9,30,35]. We also note that our inclusion of transmission heterogeneities  
561 as in [1], together with our weighting of the risk of introductions based on event size, do reflect  
562 some features of real-world transmission networks while preserving interpretability.

563 Second, we assumed that event sizes and durations were pre-determined and fixed the overall  
564 import rate across all events. However, risk awareness could itself reduce event durations,  
565 sizes, frequencies and thus the prevalence of infections. Conversely, if events are prevented,  
566 due to government policy, then less risk-averse individuals may initiate their own unregulated  
567 gatherings, which could increase transmission (a rebound effect) [15]. This feedback between  
568 behaviour and environment (risk and event properties) might affect chances of superspreading  
569 [11]. Characterising this feedback is difficult due to a lack of data linking event properties and  
570 human behaviour [9,36]. Future collection and analysis of such data will be vital for grounding  
571 hypotheses and avoiding overly strong or prescriptive modelling assumptions.

572 Third, and relatedly, we did not attempt to model the causes of or temporal changes in the  
573 different levels of perceived infection risks among individuals. During initial epidemic stages  
574 and especially for novel pathogens, data can be sparse and erratic [35,37]. The perception of  
575 the risks associated with acquiring infection may therefore be affected by unreliable reports  
576 and major uncertainty about the true risk posed by the invading pathogen. Moreover, these  
577 risk perceptions might change across time as population immunity builds or if pharmaceuticals  
578 that reduce the severity of infections are introduced at later epidemic stages. It could even be  
579 the case that after the epidemic peak, the less risk averse individuals are actually more likely  
580 to harbour at least partial immunity. Modelling these poorly understood effects would require  
581 strong assumptions that are hard to validate.

582 To avoid all of the above issues, we only considered initial epidemic stages and focussed on  
583 isolating the risk-awareness induced patterns given a set of events and a prevalence baseline.  
584 We made a minimal assumption, supported by survey data on population behaviours [12–14],  
585 that there is a spectrum of risk about this baseline. Our aim was twofold – to discover how risk  
586 perceptions could impact superspreading and to show why collecting auxiliary data describing  
587 variations in epidemic-related human behaviour, such as event attendance, are necessary.  
588 Improving understanding of the coupling between risk-sensitive behaviours and epidemiology  
589 would create a platform for future investigation of the outstanding problems mentioned above.

590 While our modelling approach is relatively simple, it provides clear evidence that behavioural  
591 patterns can substantially amplify the risk of superspreading. Heterogeneity in infection risk  
592 perception within host populations, modelled by an event size-biased importation rate  $\epsilon(n)$ ,  
593 translates into the potential for substantial transmission at large events during early stages of  
594 infectious disease epidemics. Because superspreading plays a pivotal role in epidemic growth  
595 and the chance of pathogen establishment, further data are required to uncover and specify  
596 the form of  $\epsilon(n)$  and the mechanisms that shape the coupling between epidemiological and  
597 behavioural patterns. We bolster calls for enhanced surveillance that collects such data [9,30].  
598 Surveys linking perceptions of infection risk with attendance at events [19] are essential to  
599 determine when variability in risk awareness may be a principal driver of superspreading. This  
600 is important to inform, design and target public health interventions more effectively [4].

## 601 Bibliography

- 602 1. Lloyd-Smith JO, Schreiber SJ, Kopp PE, Getz WM. Superspreading and the effect of  
603 individual variation on disease emergence. *Nature*. 2005;438: 355–359.  
604 doi:10.1038/nature04153
- 605 2. Heesterbeek H, Anderson RM, Andreasen V, Bansal S, De Angelis D, Dye C, et al.  
606 Modeling infectious disease dynamics in the complex landscape of global health.  
607 *Science*. 2015;347: aaa4339. doi:10.1126/science.aaa4339
- 608 3. Althouse BM, Wenger EA, Miller JC, Scarpino SV, Allard A, Hébert-Dufresne L, et al.  
609 Superspreading events in the transmission dynamics of SARS-CoV-2: Opportunities  
610 for interventions and control. *PLoS Biol*. 2020;18: e3000897.  
611 doi:10.1371/journal.pbio.3000897
- 612 4. Frieden TR, Lee CT. Identifying and Interrupting Superspreading Events-Implications  
613 for Control of Severe Acute Respiratory Syndrome Coronavirus 2. *Emerging Infect Dis*.  
614 2020;26: 1059–1066. doi:10.3201/eid2606.200495
- 615 5. Lau MSY, Dalziel BD, Funk S, McClelland A, Tiffany A, Riley S, et al. Spatial and  
616 temporal dynamics of superspreading events in the 2014-2015 West Africa Ebola  
617 epidemic. *Proc Natl Acad Sci USA*. 2017;114: 2337–2342.  
618 doi:10.1073/pnas.1614595114
- 619 6. Goyal A, Reeves DB, Cardozo-Ojeda EF, Schiffer JT, Mayer BT. Viral load and  
620 contact heterogeneity predict SARS-CoV-2 transmission and super-spreading events.  
621 *Elife*. 2021;10. doi:10.7554/eLife.63537
- 622 7. Sun K, Wang W, Gao L, Wang Y, Luo K, Ren L, et al. Transmission heterogeneities,  
623 kinetics, and controllability of SARS-CoV-2. *Science*. 2021;371.  
624 doi:10.1126/science.abe2424
- 625 8. Chen PZ, Bobrovitz N, Premji Z, Koopmans M, Fisman DN, Gu FX. Heterogeneity in  
626 transmissibility and shedding SARS-CoV-2 via droplets and aerosols. *Elife*. 2021;10.  
627 doi:10.7554/eLife.65774
- 628 9. Funk S, Bansal S, Bauch CT, Eames KTD, Edmunds WJ, Galvani AP, et al. Nine  
629 challenges in incorporating the dynamics of behaviour in infectious diseases models.  
630 *Epidemics*. 2015;10: 21–25. doi:10.1016/j.epidem.2014.09.005
- 631 10. Silk MJ, Carrignon S, Bentley RA, Fefferman NH. Improving pandemic mitigation  
632 policies across communities through coupled dynamics of risk perception and  
633 infection. *Proc Biol Sci*. 2021;288: 20210834. doi:10.1098/rspb.2021.0834
- 634 11. Weitz JS, Park SW, Eksin C, Dushoff J. Awareness-driven behavior changes can shift  
635 the shape of epidemics away from peaks and toward plateaus, shoulders, and  
636 oscillations. *Proc Natl Acad Sci USA*. 2020;117: 32764–32771.



- 637 doi:10.1073/pnas.2009911117  
638 12. Wise T, Zbozinek TD, Michelini G, Hagan CC, Mobbs D. Changes in risk perception  
639 and self-reported protective behaviour during the first week of the COVID-19 pandemic  
640 in the United States. *R Soc Open Sci.* 2020;7: 200742. doi:10.1098/rsos.200742  
641 13. d'Andrea V, Gallotti R, Castaldo N, De Domenico M. Individual risk perception and  
642 empirical social structures shape the dynamics of infectious disease outbreaks. *PLoS*  
643 *Comput Biol.* 2022;18: e1009760. doi:10.1371/journal.pcbi.1009760  
644 14. Wambua J, Loedy N, Jarvis CI, Wong KLM, Faes C, Grah R, et al. The influence of  
645 COVID-19 risk perception and vaccination status on the number of social contacts  
646 across Europe: insights from the CoMix study. *BMC Public Health.* 2023;23: 1350.  
647 doi:10.1186/s12889-023-16252-z  
648 15. Drury J, Rogers MB, Marteau TM, Yardley L, Reicher S, Stott C. Re-opening live  
649 events and large venues after Covid-19 “lockdown”: Behavioural risks and their  
650 mitigations. *Saf Sci.* 2021;139: 105243. doi:10.1016/j.ssci.2021.105243  
651 16. Eksin C, Paarporn K, Weitz JS. Systematic biases in disease forecasting - The role of  
652 behavior change. *Epidemics.* 2019;27: 96–105. doi:10.1016/j.epidem.2019.02.004  
653 17. Funk S, Gilad E, Watkins C, Jansen VAA. The spread of awareness and its impact on  
654 epidemic outbreaks. *Proc Natl Acad Sci USA.* 2009;106: 6872–6877.  
655 doi:10.1073/pnas.0810762106  
656 18. Chan HF, Skali A, Savage DA, Stadelmann D, Torgler B. Risk attitudes and human  
657 mobility during the COVID-19 pandemic. *Sci Rep.* 2020;10: 19931.  
658 doi:10.1038/s41598-020-76763-2  
659 19. Shiina A, Niitsu T, Kobori O, Idemoto K, Hashimoto T, Sasaki T, et al. Relationship  
660 between perception and anxiety about COVID-19 infection and risk behaviors for  
661 spreading infection: A national survey in Japan. *Brain Behav Immun Health.* 2020;6:  
662 100101. doi:10.1016/j.bbih.2020.100101  
663 20. Savadori L, Lauriola M. Risk perceptions and COVID-19 protective behaviors: A two-  
664 wave longitudinal study of epidemic and post-epidemic periods. *Soc Sci Med.*  
665 2022;301: 114949. doi:10.1016/j.socscimed.2022.114949  
666 21. Dryhurst S, Schneider CR, Kerr J, Freeman ALJ, Recchia G, van der Bles AM, et al.  
667 Risk perceptions of COVID-19 around the world. 2022;  
668 22. Mossong J, Hens N, Jit M, Beutels P, Auranen K, Mikolajczyk R, et al. Social contacts  
669 and mixing patterns relevant to the spread of infectious diseases. *PLoS Med.* 2008;5:  
670 e74. doi:10.1371/journal.pmed.0050074  
671 23. Tupper P, Pai S, COVID Schools Canada, Colijn C. COVID-19 cluster size and  
672 transmission rates in schools from crowdsourced case reports. *Elife.* 2022;11.  
673 doi:10.7554/eLife.76174  
674 24. Tupper P, Boury H, Yerlanov M, Colijn C. Event-specific interventions to minimize  
675 COVID-19 transmission. *Proc Natl Acad Sci USA.* 2020;117: 32038–32045.  
676 doi:10.1073/pnas.2019324117  
677 25. Champredon D, Fazil A, Ogden NH. Simple mathematical modelling approaches to  
678 assessing the transmission risk of SARS-CoV-2 at gatherings. *Can Commun Dis Rep.*  
679 2021;47: 184–194. doi:10.14745/ccdr.v47i04a02  
680 26. Garske T, Rhodes CJ. The effect of superspreading on epidemic outbreak size  
681 distributions. *J Theor Biol.* 2008;253: 228–237. doi:10.1016/j.jtbi.2008.02.038  
682 27. Green DM, Kiss IZ, Kao RR. Parameterization of individual-based models:  
683 comparisons with deterministic mean-field models. *J Theor Biol.* 2006;239: 289–297.  
684 doi:10.1016/j.jtbi.2005.07.018  
685 28. Parag KV. Sub-spreading events limit the reliable elimination of heterogeneous  
686 epidemics. *J R Soc Interface.* 2021;18: 20210444. doi:10.1098/rsif.2021.0444  
687 29. Edwards DA, Ausiello D, Salzman J, Devlin T, Langer R, Beddingfield BJ, et al.  
688 Exhaled aerosol increases with COVID-19 infection, age, and obesity. *Proc Natl Acad*  
689 *Sci USA.* 2021;118. doi:10.1073/pnas.2021830118  
690 30. Verelst F, Willem L, Beutels P. Behavioural change models for infectious disease  
691 transmission: a systematic review (2010–2015). *J R Soc Interface.* 2016;13.

- 692 doi:10.1098/rsif.2016.0820  
693 31. Tan X, Li S, Wang C, Chen X, Wu X. Severe acute respiratory syndrome epidemic and  
694 change of people's health behavior in China. *Health Educ Res.* 2004;19: 576–580.  
695 doi:10.1093/her/cyg074  
696 32. Granell C, Gómez S, Arenas A. Dynamical interplay between awareness and epidemic  
697 spreading in multiplex networks. *Phys Rev Lett.* 2013;111: 128701.  
698 doi:10.1103/PhysRevLett.111.128701  
699 33. Moinet A, Pastor-Satorras R, Barrat A. Effect of risk perception on epidemic spreading  
700 in temporal networks. *Phys Rev E.* 2018;97: 012313.  
701 doi:10.1103/PhysRevE.97.012313  
702 34. Bauch CT, Galvani AP. Epidemiology. Social factors in epidemiology. *Science.*  
703 2013;342: 47–49. doi:10.1126/science.1244492  
704 35. Parag KV, Donnelly CA, Zarebski AE. Quantifying the information in noisy epidemic  
705 curves. *Nat Comput Sci.* 2022;2: 584–594. doi:10.1038/s43588-022-00313-1  
706 36. Cauchemez S, Bosetti P, Cowling BJ. Managing sources of error during pandemics.  
707 *Science.* 2023;379: 437–439. doi:10.1126/science.add3173  
708 37. Yan P, Chowell G. *Quantitative Methods for Investigating Infectious Disease*  
709 *Outbreaks.* Cham, Switzerland: Springer; 2019.  
710

## 711 **Funding**

712 KVP acknowledges funding from the MRC Centre for Global Infectious Disease Analysis  
713 (reference MR/R015600/1), jointly funded by the UK Medical Research Council (MRC) and  
714 the UK Foreign, Commonwealth and Development Office (FCDO), under the MRC/FCDO  
715 Concordat agreement and is also part of the EDCTP2 programme supported by the European  
716 Union. The funders had no role in study design, data collection and analysis, decision to  
717 publish, or manuscript preparation. For the purpose of open access, the author has applied a  
718 'Creative Commons Attribution' (CC BY) licence to any Author Accepted Manuscript version  
719 arising from this submission.

## 720 **Data availability statement**

721 All data and code to reproduce the analyses and figures of this work and to compute formulae  
722 from the Methods are freely available (in MATLAB) at: <https://github.com/kpzoo/smallscaleR>.
